# Supplementary material for: Prognostic role of pretreatment platelet to lymphocyte ratio in urologic cancer
Source: PubMed Central journal article supplement (PMC5642603; doi:10.18632/oncotarget.20147), 2017-08-10
Supplement: oncotarget-08-70874-s001.pdf [file oncotarget-08-70874-s001.pdf]

# Prognostic role of pretreatment platelet to lymphocyte ratio in urologic cancer

## SUPPLEMENTARY MATERIALS

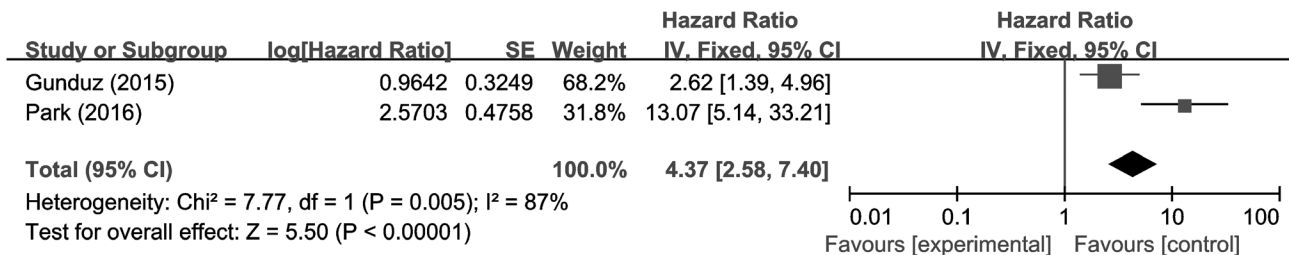

Supplementary Figure 1: Forest plot of the hazard ratio for the association between an elevated platelet to lymphocyte ratio and progression-free survival in renal cancer.

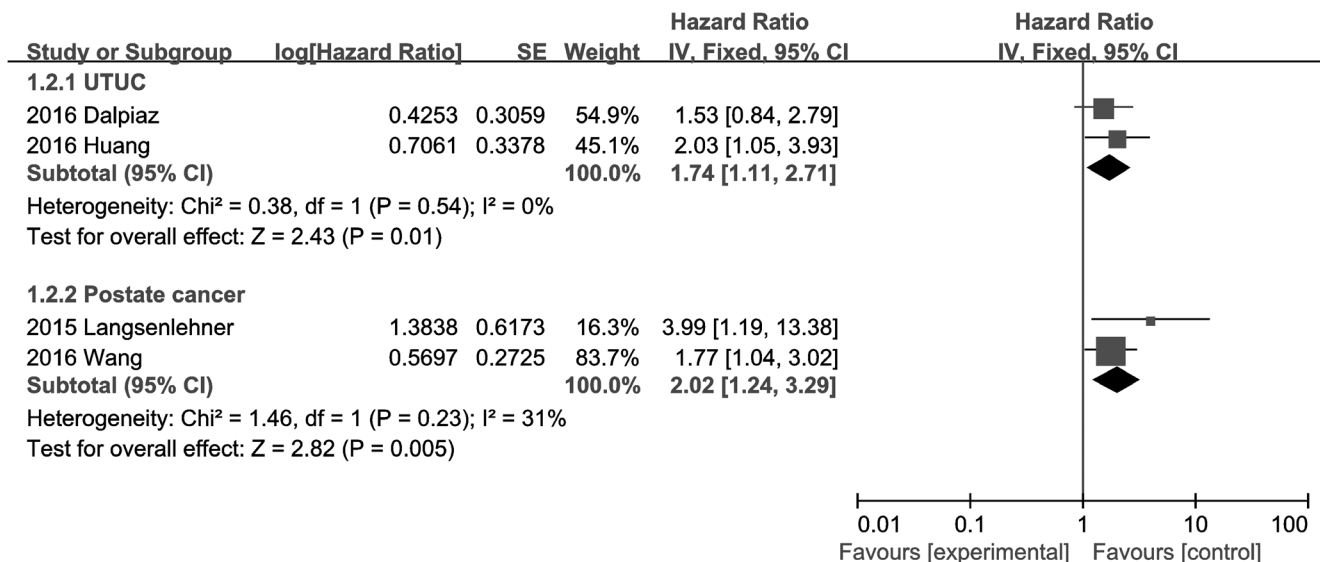

Supplementary Figure 2: Forest plot of the hazard ratio for the association between an elevated platelet to lymphocyte ratio and cancer-specific survival in UTUC and prostate cancer.
